# Supplementary material
Source: publisher site journal article supplement (https://www.dovepress.com/article/255828)

**Supplement**

**Figure S1 Distribution of BMSCs-Exos in the injured brain region following ICH.** Representative immunofluorescence pictures of hemorrhagic region from rats receiving Dil-labeled BMSCs-Exos or BMSCs-miR-146a-5p-Exos. Pictures were taken under 100× or 400× magnification. The scale bars represent 200 nm and 50 nm, respectively.


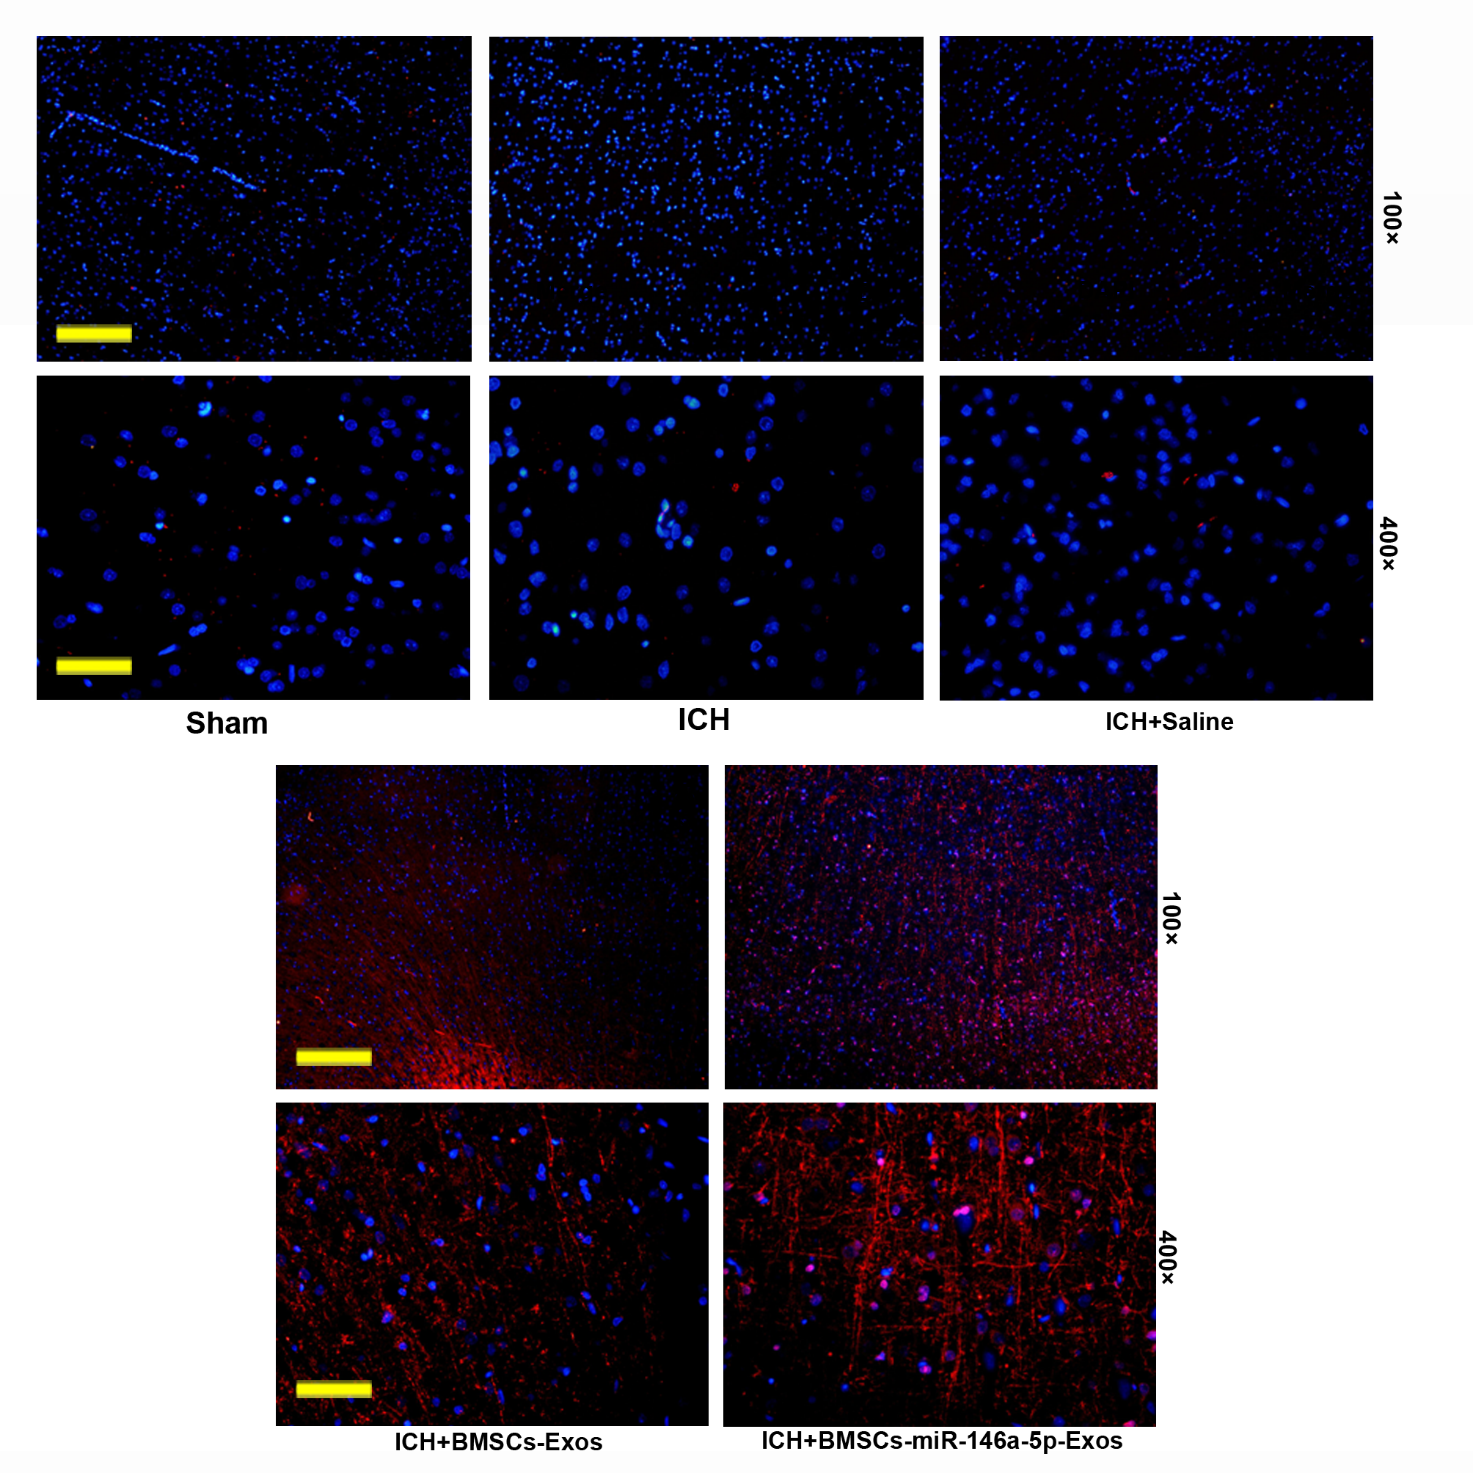


**Figure S2 PAK3 and MAP1B were target genes of miR-146a-5p.** (A and B) Expression level of PAK3 and MAP1B protein in the injured brain tissue of rats. (C) A photograph depicted targeting sites of miR-146a-5p on PAK3 and MAP1B mRNA. (D and E) Dual-luciferase assay was performed to test binding between miR-146a-5p/PAK3 and miR-146a-5p/MAP1B. The data are presented as the mean ± SD, *p < 0.05, **p < 0.01, ***p < 0.001.


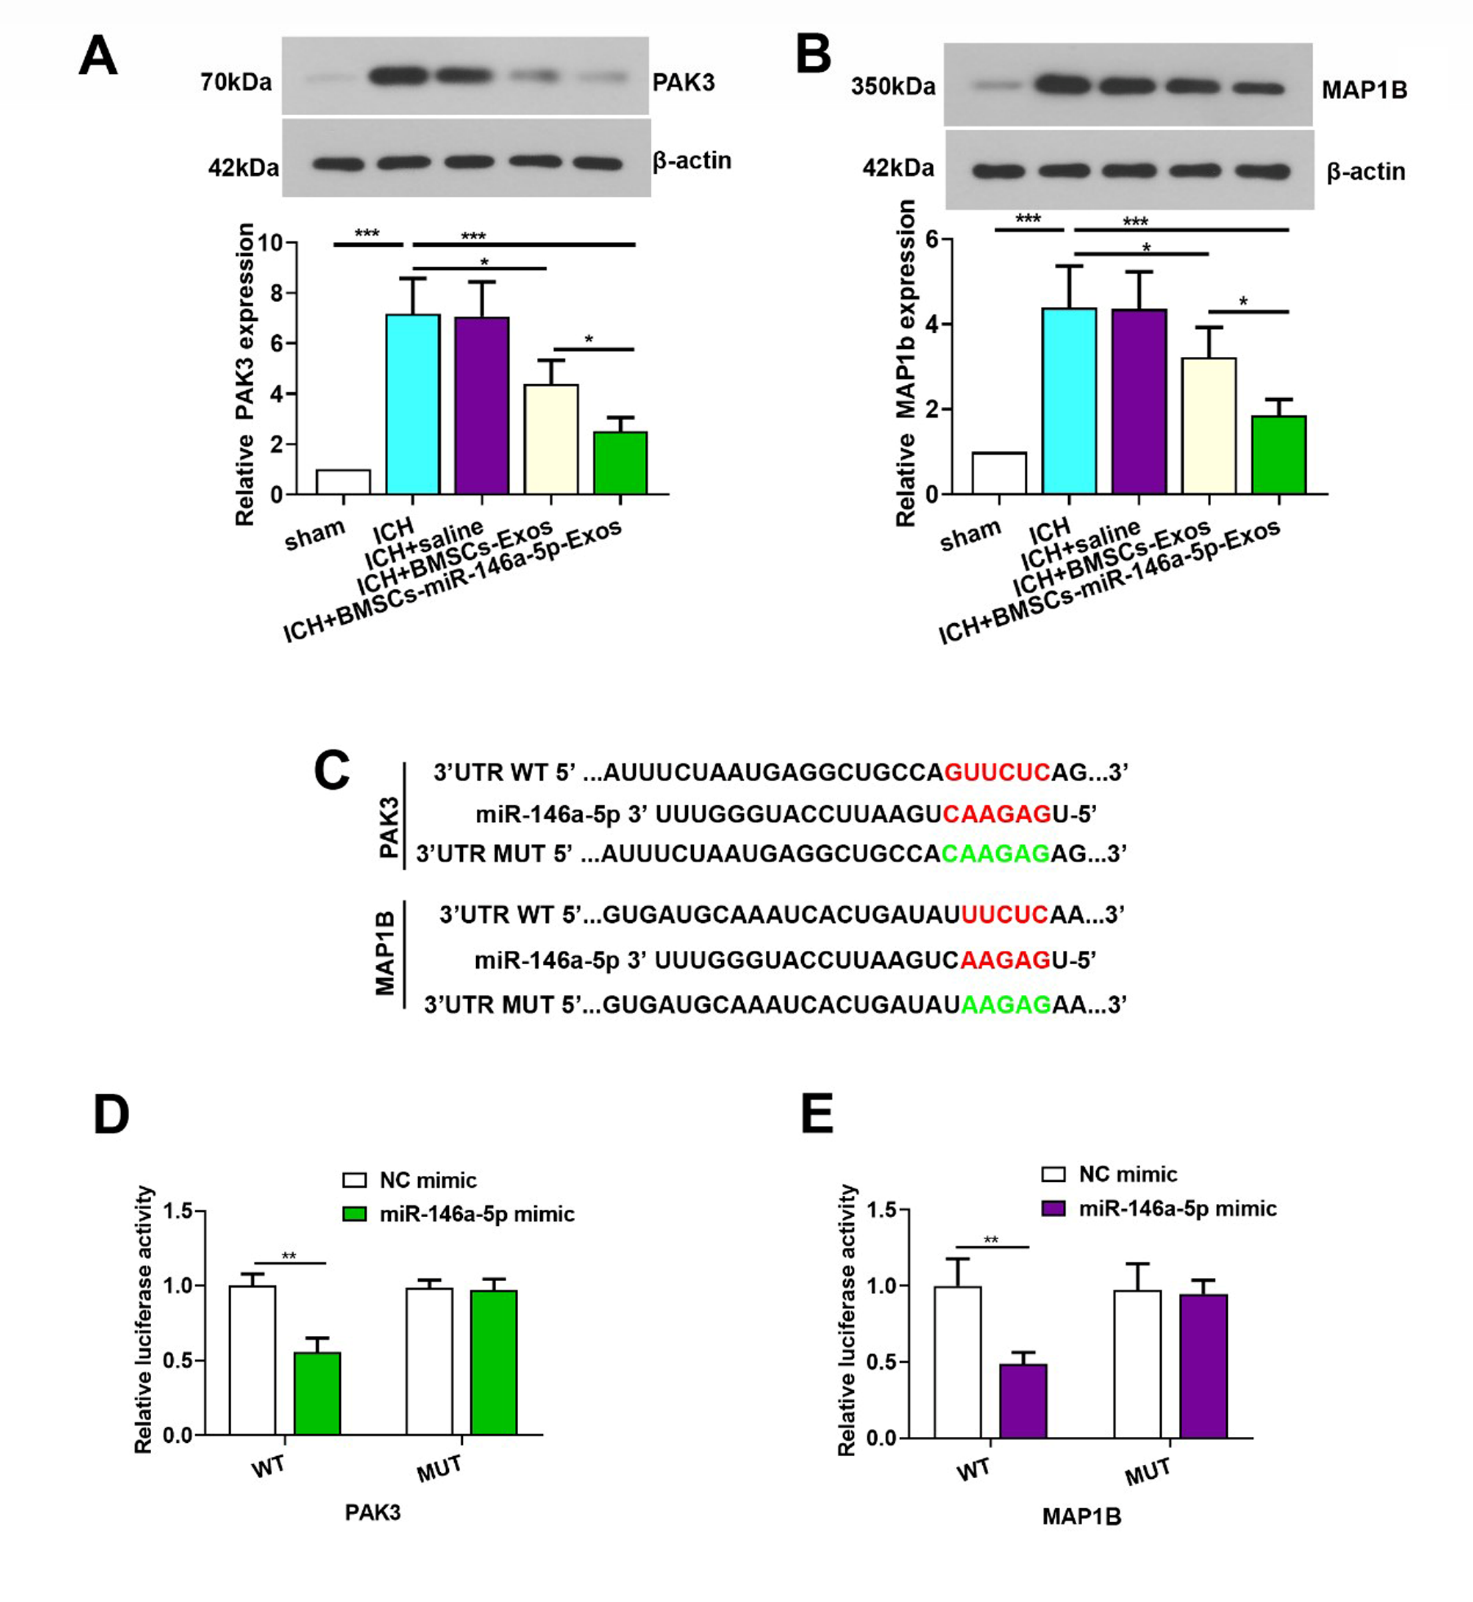

Supplement: Supplementary file 1 [file get_supplementary_file.php]
